# Supplementary material for: Rediscovering phthalonitrile resins: a novel liquid monomer towards high-performance resins
Source: Royal Society of Chemistry journal article supplement (doi:10.1039/d4py00100a), 2024-01-01
Supplement: d4py00100a1.pdf [file d4py00100a1.pdf]

Supplementary Materials for  
**Rediscovering phthalonitrile resins: Novel  
liquid monomer towards high-performance  
resin**

*Muyao Gao*<sup>a,b,#</sup>, *Qian Wu*<sup>a,#</sup>, *Tianhao Li*<sup>b</sup>, *Li Liu*<sup>a</sup>, *Bing Li*<sup>a,\*</sup>, *Yujie Song*<sup>b,\*</sup>, *Ming*

*Liu*<sup>a,b</sup>

<sup>a</sup> School of Chemistry and Chemical Engineering, Harbin Institute of Technology,  
Harbin 150001, China.

<sup>b</sup> Engineering Laboratory of Advanced Energy Materials, Ningbo Institute of  
Materials Technology and Engineering, Chinese Academy of Sciences, Ningbo  
315201, China.

<sup>#</sup> These authors contributed to the work equally and should be regarded as co-first  
authors

\* To whom correspondence should be addressed. Email: [songyujie@nimte.ac.cn](mailto:songyujie@nimte.ac.cn);  
[liuming0117@hit.edu.cn](mailto:liuming0117@hit.edu.cn)

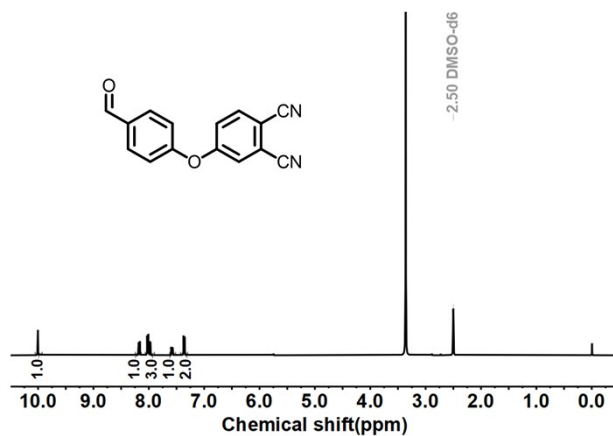

**Figure S1.** <sup>1</sup>H NMR spectrum of CHO-Pn.

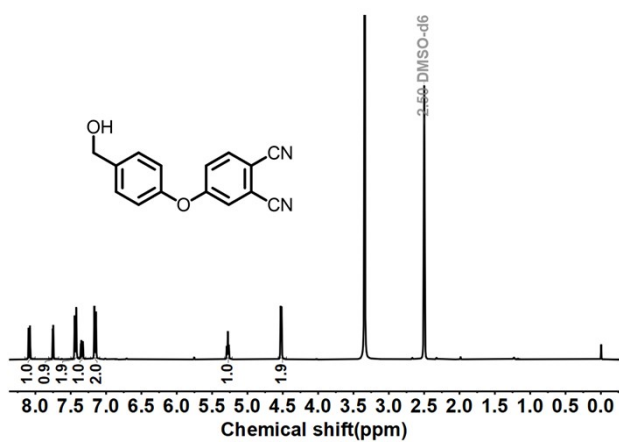

**Figure S2.** <sup>1</sup>H NMR spectrum of OH-Pn.

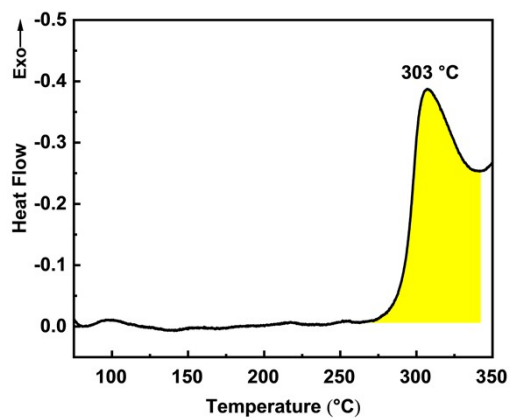

**Figure S3.** DSC curve for the mixture of SiPn and *p*-APB.

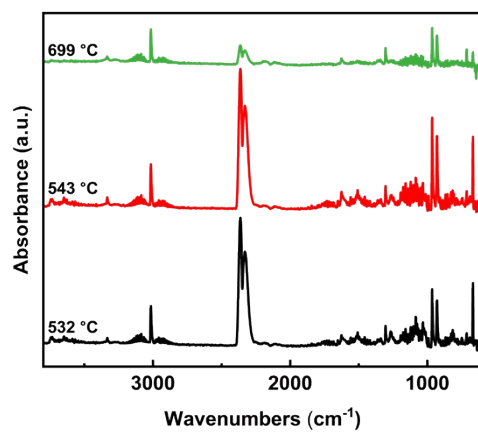

**Figure S4.** FTIR spectra of volatile products at representative temperature of SiPN resin.

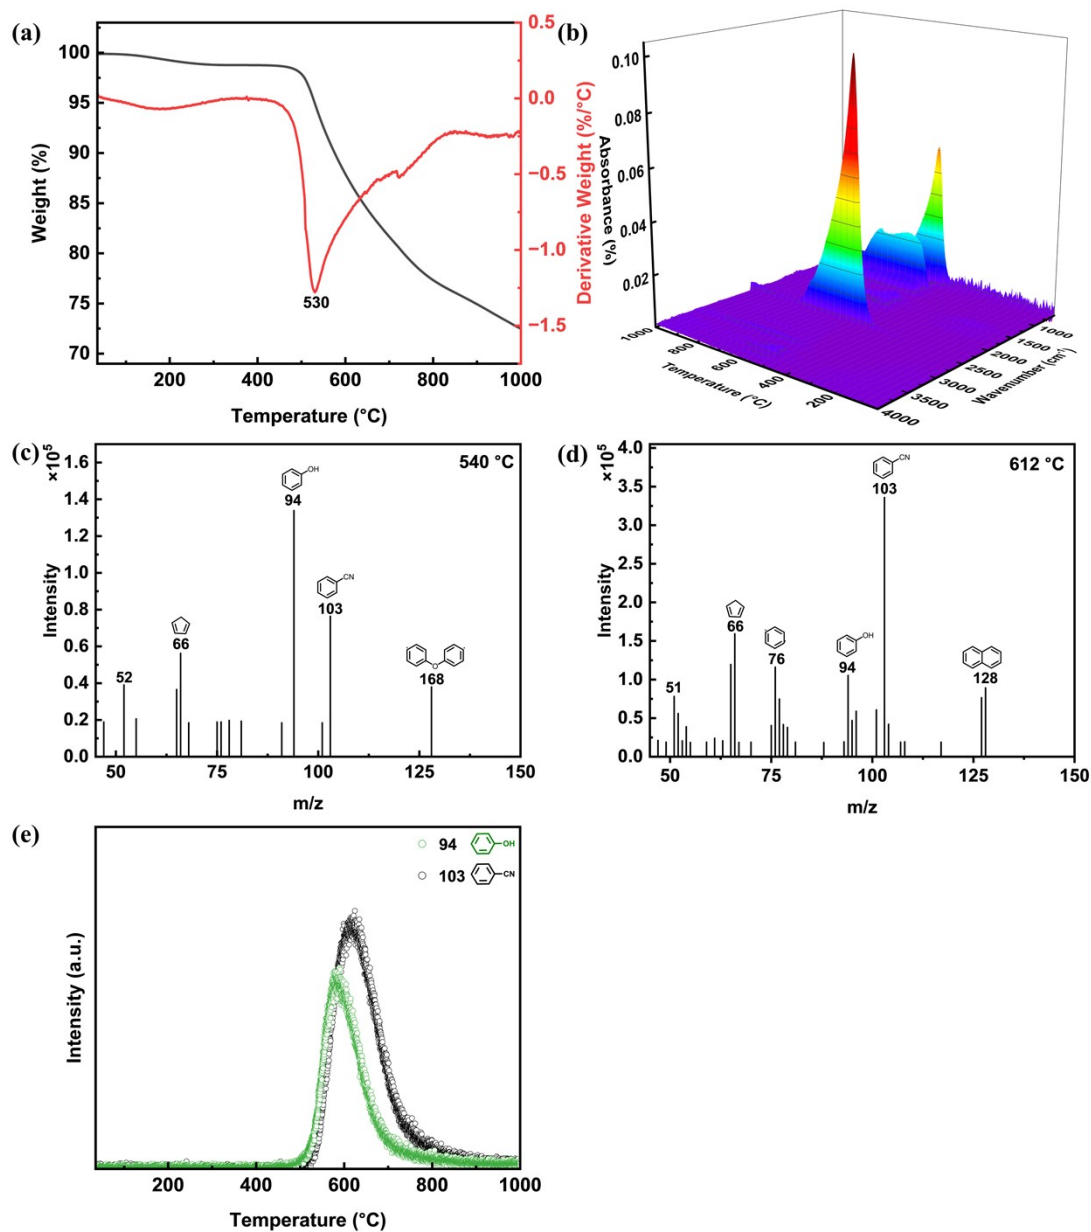

**Figure S5.** (a) TGA and DTG curves of RPN; (b) 3D FTIR diagram of volatile products; MS spectra of volatile products from RPN at (c) 540 °C, (d) 612 °C and (e) the ion current of phenol ( $m/z = 94$ ) and benzonitrile ( $m/z = 103$ ).

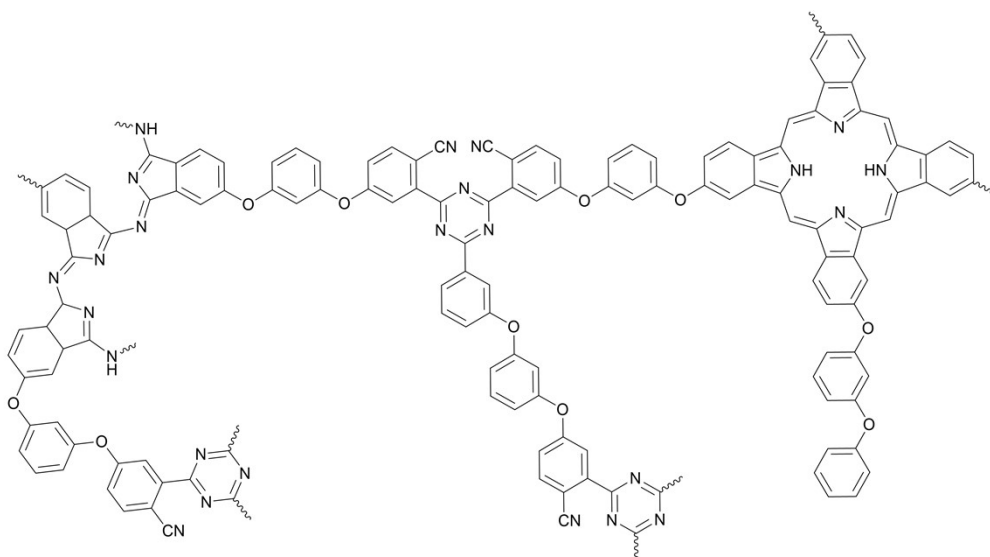

**Figure S6.** Possible molecular structure of RPN.

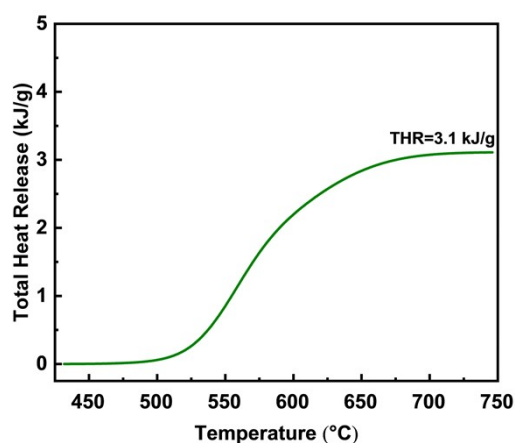

**Figure S7.** Total heat release as a function of the temperature for SiPN.

**Table S1.** The molecular structures and  $T_m$  (or  $T_g$ ) of the monomers considered in comparison to the known monomers.

| Molecular Structure | $T_g/T_m$<br>/°C | Reference |
|---------------------|------------------|-----------|
|                     | -12.1            | 29        |

|                                                                                      |         |    |
|--------------------------------------------------------------------------------------|---------|----|
| 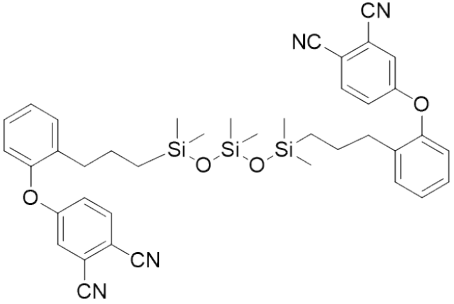    | -25.9   |    |
|     | -35.6   |    |
|     | 233-238 | 15 |
|   | 183-188 | 17 |
|   | 194-200 | 16 |
|   | 235-238 |    |
|   | 39-42   | 27 |
|  | 70      | 26 |
|  | 109-142 | 41 |
|   | 92      | 19 |

|                                                                                   |       |    |
|-----------------------------------------------------------------------------------|-------|----|
| 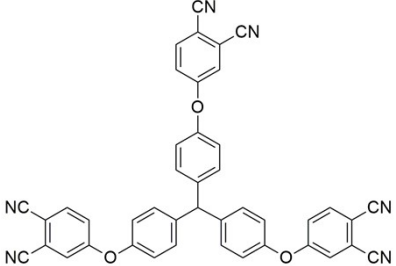 | 103   | 20 |
|  | 4     | 24 |
|  | 40-60 | 21 |
|  |       |    |
|  |       |    |
